# Supplementary material for: Nuclear Chk1 prevents premature mitotic entry
Source: Oxford University Press journal article supplement (doi:10.1242/jcs.086488), 2011-06-01
Supplement: jcs086488tables1.pdf [file jcs086488tables1.pdf]

**Table S1. Identification of DCS-310-reactive proteins.**

|           | <b>Gene name</b> | <b>Entry Clone ID</b> | <b>Definition</b>                                   | <b>Well Position</b> |
|-----------|------------------|-----------------------|-----------------------------------------------------|----------------------|
| <b>1</b>  | CHEK1            | FLJ80044<br>AAAF      | CHK1 checkpoint homolog ( <i>S. pombe</i> )         | AA01 A05-06          |
| <b>2</b>  | MORF4L2          | FLJ31450<br>AAAF      | mortality factor 4 like 2                           | AA01 B13-14          |
| <b>3</b>  | FOXR2            | FLJ81903<br>AAAF      | forkhead box R2                                     | AA01 A21-22          |
| <b>4</b>  | GFI1             | FLJ16812<br>AAAF      | growth factor independent 1 transcription repressor | AA02 B11-12          |
| <b>5</b>  | BEGAIN           | FLJ80969<br>AAAF      | brain-enriched guanylate kinase-associated homolog  | AA01 D19-20          |
| <b>6</b>  | TRIM21           | FLJ81065<br>AAAF      | tripartite motif-containing 21                      | AA02 D07-08          |
| <b>7</b>  | CWC25            | FLJ20291<br>AAAF      | CWC25 spliceosome-associated protein homolog        | AA02 D15-16          |
| <b>8</b>  | BICD2            | FLJ82421<br>AAAF      | bicaudal D homolog 2                                | AA01 F11-12          |
| <b>9</b>  | STX4             | FLJ96817<br>AAAF      | syntaxin 4                                          | AA01 E17-18          |
| <b>10</b> | TBC1D25          | FLJ54629<br>AAAF      | TBC1 domain family member 25                        | AA02 E15-16          |
| <b>11</b> | WARS             | FLJ31538<br>AAAF      | tryptophanyl-tRNA synthetase                        | AA01 G11-12          |
| <b>12</b> | CCDC151          | FLJ31801<br>AAAF      | coiled-coil domain containing 151                   | AA01 G21-22          |
| <b>13</b> | DYDC1            | FLJ43920<br>AAAF      | DPY30 domain containing 1                           | AA01 J01-02          |
| <b>14</b> | LZTFL1           | FLJ36386<br>AAAF      | leucine zipper transcription factor-like 1          | AA01 I05-06          |
| <b>15</b> | GRIP1            | FLJ55860<br>AAAF      | growth hormone regulated TBC protein 1              | AA01 I21-22          |
| <b>16</b> | DBN1             | FLJ36806<br>AAAF      | drebrin 1                                           | AA02 J09-10          |
| <b>17</b> | LOC28368<br>5    | FLJ36144<br>AAAF      | golgi autoantigen, golgin subfamily a-like          | AA02 J17-18          |
| <b>18</b> | TPM1             | FLJ55130<br>AAAF      | tropomyosin 1 alpha                                 | AA02 I23-24          |

“Well Position” corresponds to that in supplementary material Fig. S1B. For example,

Chk1 spots were detected at A05-A06 position in 01 array.
