# Supplementary figures and images for: Nuclear Chk1 prevents premature mitotic entry
Source: Oxford University Press journal article supplement (doi:10.1242/jcs.086488), 2011-06-01

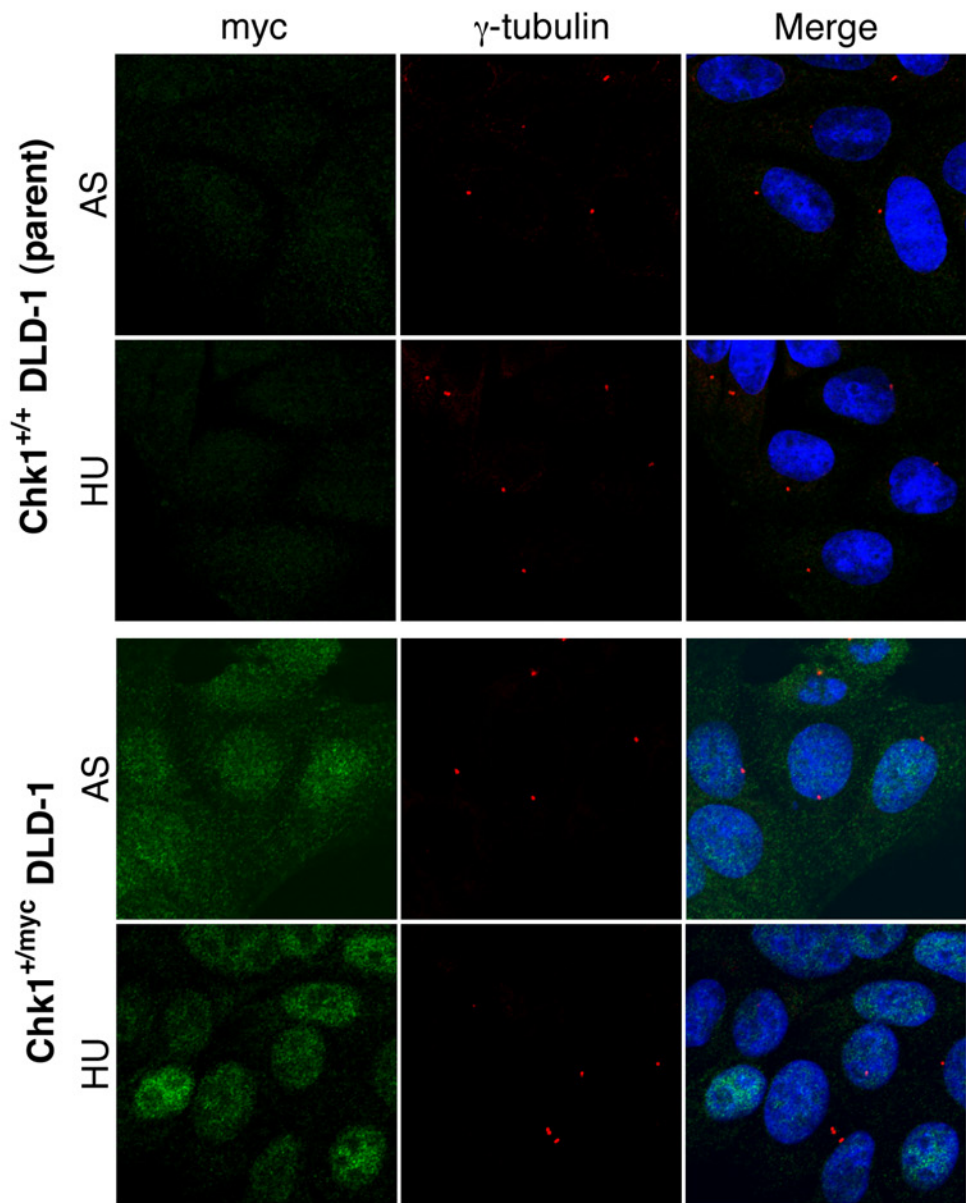

Supplement: jcs086488figs1.pdf [file jcs086488figs1.pdf]

**A**

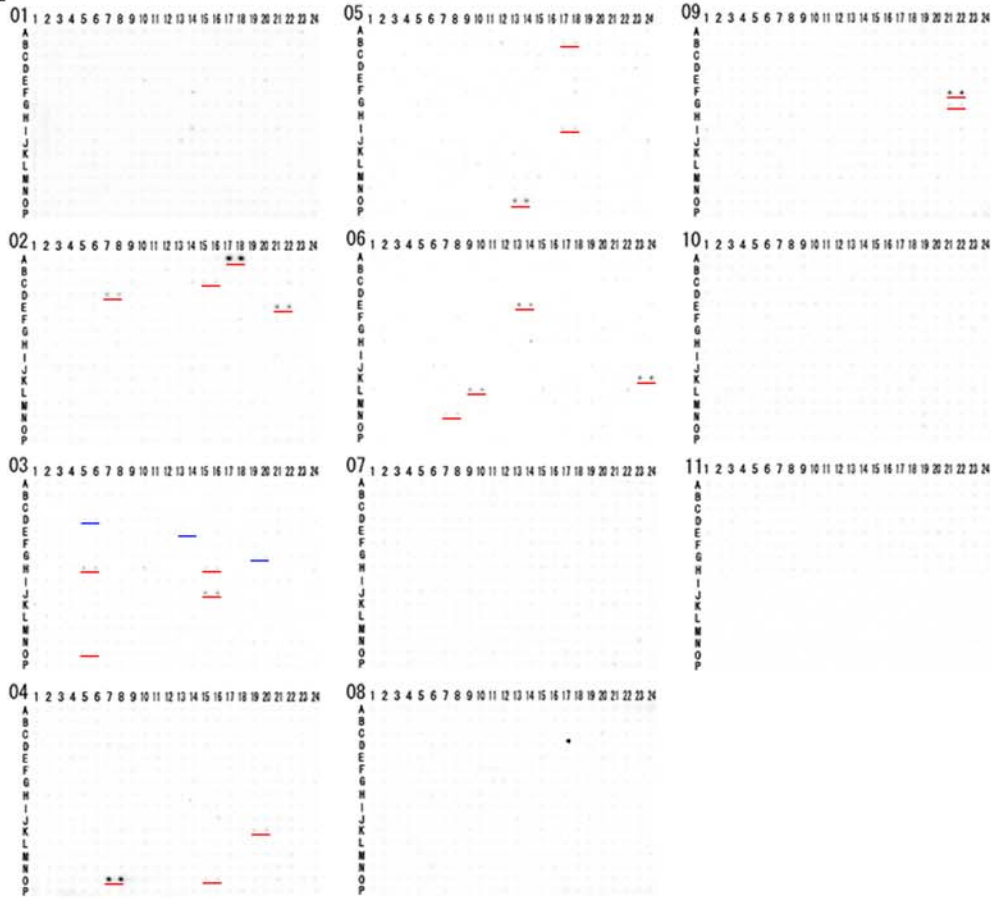

**B**

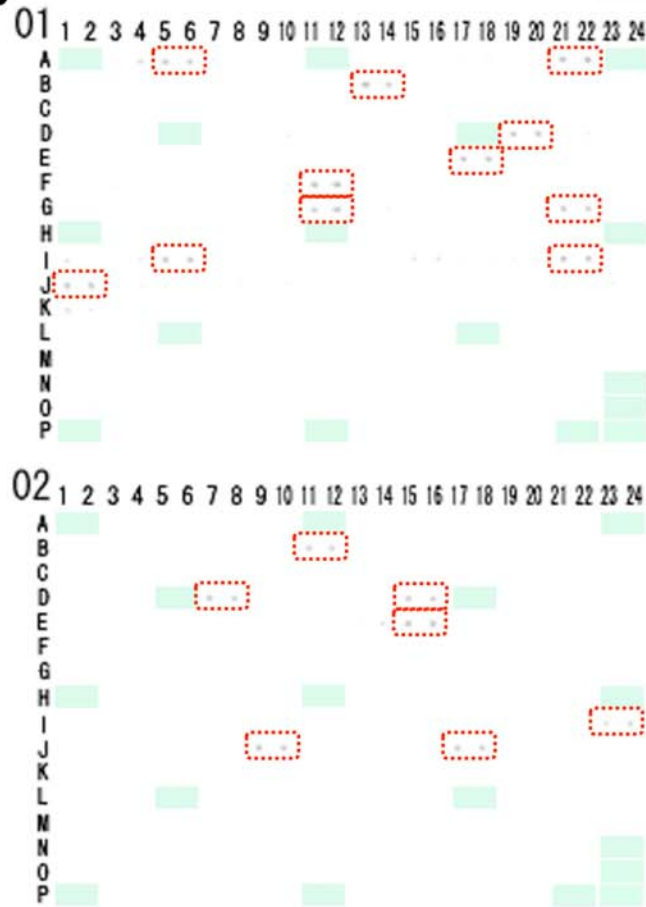

 : Negative control

Supplement: jcs086488figs2.pdf [file jcs086488figs2.pdf]

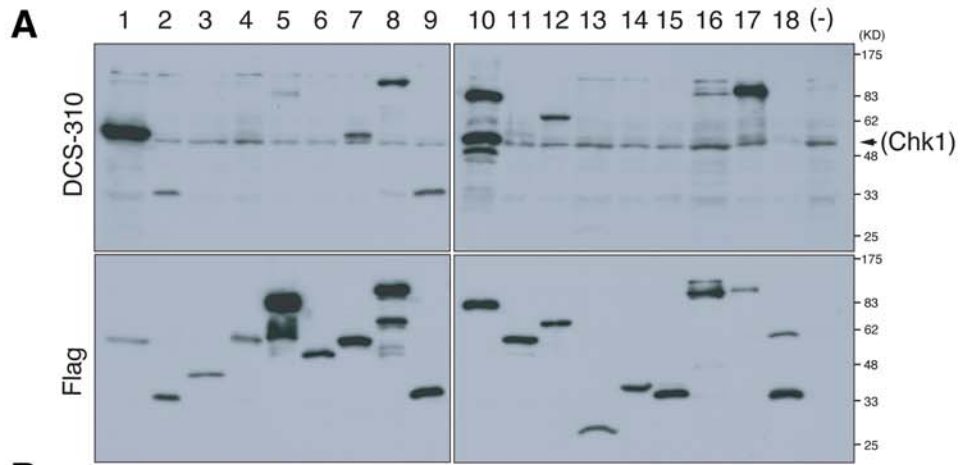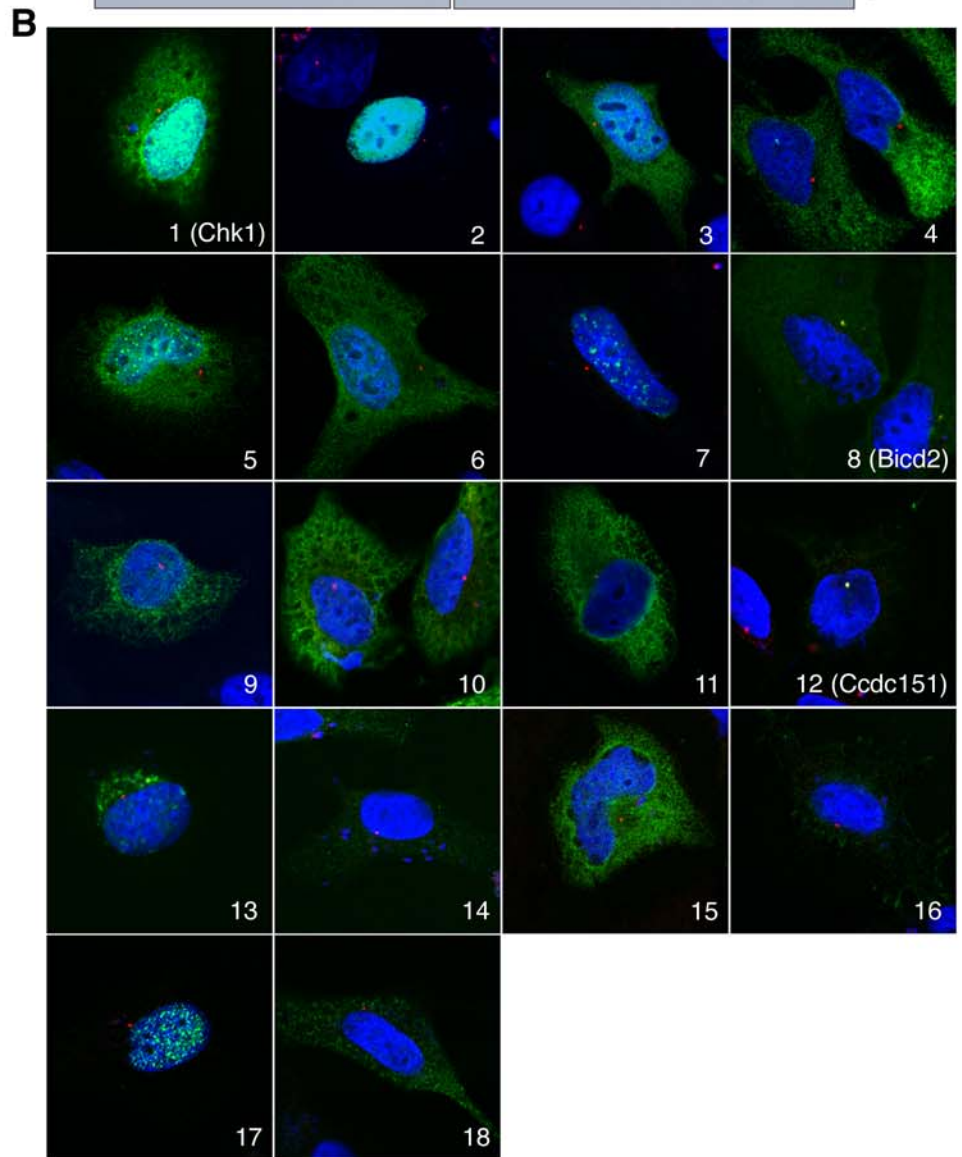

Supplement: jcs086488figs3.pdf [file jcs086488figs3.pdf]
